# Supplementary material for: Apabetalone, a Clinical-Stage, Selective BET Inhibitor, Opposes DUX4 Target Gene Expression in Primary Human FSHD Muscle Cells
Source: MDPI journal article supplement (doi:10.3390/biomedicines11102683), 2023-09-30
Supplement: s1 [file s1]

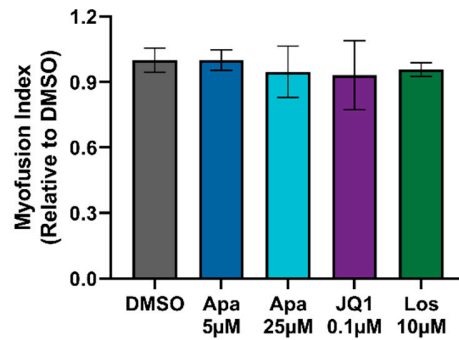

**Figure S1: Myofusion Index was Not Impacted by Apabetalone, JQ1, or Losmapimod Treatment**

Myofusion Index (MI), defined as the percentage of nuclei within myosin heavy chain (MHC) positive multinucleated cells, was determined following 144h of pre-differentiation and 72h of treatment. MHC<sup>+</sup> and MHC<sup>-</sup> nuclei counts for 3 distinct imaging fields were pooled for each sample. Bars show mean  $\pm$  SEM of three samples, significance calculated by one-way ANOVA with Dunnett's post-testing for multiple comparisons.

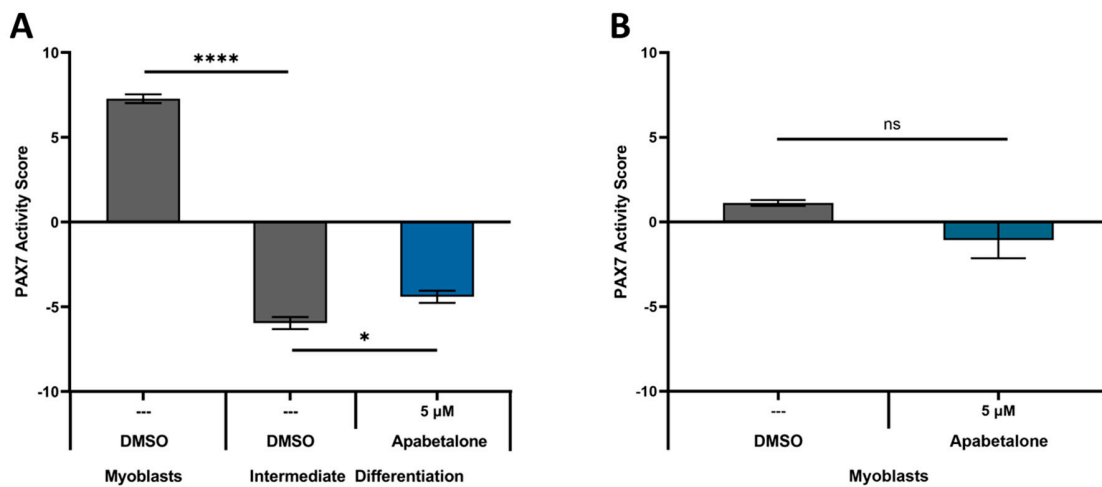

**Figure S2: Apabetalone Treatment Impacts on PAX7 Activity Score Depend on Stage of Differentiation**

Composite biomarkers of and PAX7 activity, derived and validated by Banerji et al. [19,44], were used to evaluate treatment impact on undifferentiated (A) pHSMCs, and intermediate differentiation (B) based on RNA-seq data. Intermediate samples were allowed to differentiate for three days prior to treatment and all samples were treated for one day. Bars show mean  $\pm$  SEM of three technical replicates, and statistical significance was assessed by one-way ANOVA with Dunnett's post-testing for intermediate samples and by unpaired Student's t-test for undifferentiated samples.

**Table S1:** Donor Details and Source of pHSMCs

| Cell ID              | Donor 1<br>(GM17869)                | Donor 2<br>(GM17940)                |
|----------------------|-------------------------------------|-------------------------------------|
| Source               | NIGMS Human Genetic Cell Repository | NIGMS Human Genetic Cell Repository |
| Genotype             | FSHD1                               | FSHD1                               |
| Clinically Affected  | Yes                                 | Yes                                 |
| D4Z4 Repeats – 4q35  | 5 / 31                              | 3 / 33                              |
| D4Z4 Repeats – 10q26 | 5 / 39                              | 15 / 26                             |
| Age at Sampling      | 21                                  | 13                                  |
| Sex                  | Female                              | Male                                |
| Cell Type            | Skeletal myoblast                   | Skeletal myoblast                   |

**Table S2:** List of TaqMan Assay IDs Used for qRT-PCR Evaluation of pHSMCs

| Gene Name                                          | Symbol        | TaqMan Assay ID |
|----------------------------------------------------|---------------|-----------------|
| Zinc Finger and SCAN Domain-Containing Protein 4   | <i>ZSCAN4</i> | Hs00537549_m1   |
| Methyl-CpG Binding Domain Protein 3 Like Protein 2 | <i>MBD3L2</i> | Hs00544743_m1   |
| Myosin Heavy Chain 2                               | <i>MYH2</i>   | Hs01126511_m1   |
| Paired Box 7                                       | <i>PAX7</i>   | Hs00242962_m1   |
| Myogenin                                           | <i>MYOG</i>   | Hs01072232_m1   |
| Cyclophilin A                                      | <i>PPIA</i>   | Hs99999904_m1   |

**Table S3:** Impact of Differentiation and Treatment on Terminal Differentiation Markers by RNA-seq in Donor 1 Cells

| Terminal Skeletal Muscle Differential Markers (Chal 2017 [48]) |         | Differentiation |         | Apabetalone |       |           |       |            |       | JQ1         |       | Losmapimod |       |
|----------------------------------------------------------------|---------|-----------------|---------|-------------|-------|-----------|-------|------------|-------|-------------|-------|------------|-------|
|                                                                |         | Vehicle         |         | 1 $\mu$ M   |       | 5 $\mu$ M |       | 25 $\mu$ M |       | 0.1 $\mu$ M |       | 10 $\mu$ M |       |
|                                                                |         | FC              | padj    | FC          | padj  | FC        | padj  | FC         | padj  | FC          | padj  | FC         | padj  |
| <b>Muscle Regulatory Factors</b>                               |         |                 |         |             |       |           |       |            |       |             |       |            |       |
| Myogenic Differentiation 1                                     | MYOD1   | 1.21            | 8E-03   | 1.37        | 2E-04 | 1.36      | 5E-05 | 1.35       | 3E-05 | 1.31        | 3E-04 | 0.99       | 0.95  |
| Myogenin                                                       | MYOG    | 40.76           | <1E-308 | 1.31        | 4E-03 | 1.21      | 0.04  | 0.91       | 0.34  | 1.09        | 0.40  | 1.02       | 0.85  |
| Myogenic Factor 6                                              | MYF6    | 2.18            | 1E-09   | 0.88        | 0.46  | 0.54      | 9E-06 | 0.33       | 3E-16 | 0.50        | 1E-07 | 1.13       | 0.49  |
| Nuclear Factor I X                                             | NFIX    | 1.02            | 0.79    | 0.98        | 0.79  | 1.16      | 0.02  | 1.27       | 2E-05 | 1.34        | 7E-08 | 1.40       | 9E-10 |
| <b>Primary Myogenesis Markers</b>                              |         |                 |         |             |       |           |       |            |       |             |       |            |       |
| Myosin Heavy Chain 3                                           | MYH3    | 39.30           | <1E-308 | 1.22        | 5E-04 | 1.35      | 2E-10 | 1.13       | 0.01  | 1.37        | 1E-11 | 0.76       | 5E-09 |
| Myosin Heavy Chain 7                                           | MYH7    | 33.27           | <1E-308 | 1.34        | 2E-03 | 1.58      | 1E-08 | 1.35       | 1E-04 | 1.60        | 1E-09 | 4.21       | 4E-86 |
| Myosin Heavy Chain 8                                           | MYH8    | 36.04           | <1E-308 | 1.30        | 2E-05 | 1.60      | 3E-19 | 1.34       | 4E-08 | 1.81        | 2E-31 | 1.03       | 0.69  |
| Myosin Light Chain 1                                           | MYL1    | 42.26           | <1E-308 | 1.13        | 0.18  | 1.00      | 0.98  | 0.58       | 2E-17 | 1.00        | 0.99  | 0.84       | 0.02  |
| Actin Alpha Skeletal Muscle 1                                  | ACTA1   | 42.32           | <1E-308 | 1.16        | 0.18  | 1.08      | 0.52  | 0.85       | 0.09  | 1.05        | 0.70  | 0.71       | 1E-04 |
| Actin Alpha Cardiac Muscle 1                                   | ACTC1   | 17.55           | <1E-308 | 1.43        | 1E-05 | 1.56      | 4E-10 | 1.43       | 2E-07 | 1.56        | 2E-10 | 0.92       | 0.43  |
| Cholinergic Receptor Nicotinic Gamma Subunit                   | CHRNA3  | 43.18           | <1E-308 | 0.98        | 0.84  | 1.20      | 0.06  | 1.15       | 0.14  | 1.10        | 0.40  | 0.83       | 0.04  |
| Calcium Voltage-Gated Channel Subunit Alpha1 H                 | CACNA1H | 44.87           | 2E-212  | 0.97        | 0.74  | 0.82      | 0.01  | 0.29       | 1E-78 | 0.55        | 3E-20 | 0.40       | 7E-44 |
| Solute Carrier Family 2 Member 1                               | SLC2A1  | 0.17            | <1E-308 | 1.13        | 0.05  | 1.18      | 2E-03 | 1.44       | 1E-16 | 1.32        | 2E-09 | 0.82       | 4E-05 |
| Solute Carrier Family 2 Member 4                               | SLC2A4  | 26.70           | 2E-35   | 1.43        | 0.01  | 1.36      | 0.02  | 0.47       | 7E-10 | 0.79        | 0.09  | 1.17       | 0.31  |
| <b>Secondary Myogenesis Markers</b>                            |         |                 |         |             |       |           |       |            |       |             |       |            |       |
| Myosin Heavy Chain 1                                           | MYH1    | 29.30           | 6E-306  | 1.33        | 2E-06 | 1.41      | 1E-10 | 0.82       | 4E-04 | 1.19        | 2E-03 | 0.41       | 2E-62 |
| Myosin Heavy Chain 2                                           | MYH2    | 41.12           | <1E-308 | 0.97        | 0.78  | 0.88      | 0.12  | 0.44       | 6E-38 | 0.50        | 7E-26 | 1.22       | 0.01  |
| Myosin Heavy Chain 4                                           | MYH4    | 27.22           | 3E-05   | 0.79        | nr    | 1.07      | 0.90  | 0.86       | 0.73  | 0.93        | 0.89  | 1.07       | 0.90  |
| Myosin Light Chain 3                                           | MYL3    | 23.41           | 3E-08   | 1.18        | nr    | 1.25      | 0.58  | 0.42       | 5E-03 | 0.60        | 0.12  | 0.70       | 0.34  |
| Actin Alpha Skeletal Muscle 1                                  | ACTA1   | 42.32           | <1E-308 | 1.16        | 0.18  | 1.08      | 0.52  | 0.85       | 0.09  | 1.05        | 0.70  | 0.71       | 1E-04 |

|                                                |         |              |                   |             |             |             |             |             |              |             |              |             |              |
|------------------------------------------------|---------|--------------|-------------------|-------------|-------------|-------------|-------------|-------------|--------------|-------------|--------------|-------------|--------------|
| Cholinergic Receptor Nicotinic Epsilon Subunit | CHRNE   | <b>0.60</b>  | <b>0.03</b>       | 0.82        | nr          | 0.86        | 0.71        | 0.87        | 0.70         | 0.84        | 0.63         | 0.79        | 0.50         |
| Calcium Voltage-Gated Channel Subunit Alpha1 S | CACNA1S | <b>41.65</b> | <b>&lt;1E-308</b> | 1.02        | 0.78        | 1.01        | 0.93        | <b>0.56</b> | <b>7E-38</b> | <b>0.77</b> | <b>4E-08</b> | <b>0.75</b> | <b>2E-09</b> |
| Calcium Voltage-Gated Channel Subunit Alpha1 C | CACNA1C | 0.74         | 0.05              | 0.83        | 0.38        | 0.90        | 0.69        | 1.21        | 0.31         | 1.28        | 0.17         | 1.10        | 0.71         |
| Solute Carrier Family 2 Member 4               | SLC2A4  | <b>26.70</b> | <b>2E-35</b>      | <b>1.43</b> | <b>0.01</b> | <b>1.36</b> | <b>0.02</b> | <b>0.47</b> | <b>7E-10</b> | 0.79        | 0.09         | 1.17        | 0.31         |

Terminal differentiation markers reported in Chal et al. [48]. CACNA1F, CACNA1D, CACNA1G, CACNA1I, SLC2A2 excluded from analysis due to low transcript abundance. nr = not reported in DESeq2 differential expression analysis. FC = fold change, padj = Benjamini-Hochberg adjusted p-value. Significantly differentially expressed markers highlighted in bold (padj <0.05).

.

**Table S4:** Impact of Differentiation and Treatment on Muscle Function Associated Markers by RNA-seq in Donor 1 Cells

| Neuromuscular Junction and Dyetrophin-associated Complex Markers          |        | Differentiation |                   | Apabetalone |      |             |              |             |               | JQ1         |              | Losmapimod  |              |
|---------------------------------------------------------------------------|--------|-----------------|-------------------|-------------|------|-------------|--------------|-------------|---------------|-------------|--------------|-------------|--------------|
|                                                                           |        | Vehicle         |                   | 1 $\mu$ M   |      | 5 $\mu$ M   |              | 25 $\mu$ M  |               | 0.1 $\mu$ M |              | 10 $\mu$ M  |              |
|                                                                           |        | FC              | padj              | FC          | padj | FC          | padj         | FC          | padj          | FC          | padj         | FC          | padj         |
| <b>Defined Neuromuscular Junction Function (Rodríguez Cruz 2020 [49])</b> |        |                 |                   |             |      |             |              |             |               |             |              |             |              |
| Agrin                                                                     | AGRN   | <b>1.49</b>     | <b>2E-14</b>      | 1.12        | 0.10 | <b>1.30</b> | <b>3E-06</b> | <b>1.47</b> | <b>3E-13</b>  | <b>1.37</b> | <b>5E-09</b> | 1.03        | 0.70         |
| Cholinergic Receptor Nicotinic Alpha Subunit                              | CHRNA1 | <b>10.46</b>    | <b>&lt;1E-308</b> | 1.02        | 0.76 | <b>0.82</b> | <b>1E-07</b> | <b>0.48</b> | <b>5E-103</b> | <b>0.67</b> | <b>2E-32</b> | <b>1.34</b> | <b>7E-17</b> |
| Cholinergic Receptor Nicotinic Beta Subunit                               | CHRNA1 | <b>5.89</b>     | <b>&lt;1E-308</b> | 1.01        | 0.93 | 0.95        | 0.36         | <b>0.83</b> | <b>2E-06</b>  | <b>0.81</b> | <b>6E-08</b> | <b>1.13</b> | <b>3E-03</b> |
| Cholinergic Receptor Nicotinic Gamma Subunit                              | CHRNA1 | <b>43.18</b>    | <b>&lt;1E-308</b> | 0.98        | 0.84 | 1.20        | 0.06         | <b>1.15</b> | <b>1E-01</b>  | <b>1.10</b> | <b>4E-01</b> | <b>0.83</b> | <b>4E-02</b> |
| Cholinergic Receptor Nicotinic Delta Subunit                              | CHRNA1 | <b>36.78</b>    | <b>&lt;1E-308</b> | 1.08        | 0.28 | 1.06        | 0.43         | 1.07        | 0.32          | 1.10        | 0.14         | <b>0.66</b> | <b>1E-15</b> |
| Cholinergic Receptor Nicotinic Epsilon Subunit                            | CHRNA1 | <b>0.60</b>     | <b>0.03</b>       | 0.82        | nr   | 0.86        | 0.71         | 0.87        | 0.70          | 0.84        | 0.63         | 0.79        | 0.50         |
| Docking Protein 7                                                         | DOK7   | <b>2.56</b>     | <b>3E-38</b>      | 1.06        | 0.61 | 0.88        | 0.18         | <b>0.67</b> | <b>4E-08</b>  | <b>0.71</b> | <b>1E-05</b> | 1.03        | 0.84         |
| LDL Receptor Related Protein 4                                            | LRP4   | <b>8.22</b>     | <b>5E-112</b>     | 0.87        | 0.27 | 0.88        | 0.32         | <b>0.63</b> | <b>1E-06</b>  | <b>0.70</b> | <b>3E-04</b> | <b>0.62</b> | <b>9E-07</b> |
| Microtubule Actin Crosslinking Factor 1                                   | MACF1  | <b>2.33</b>     | <b>2E-14</b>      | 0.82        | 0.20 | 0.84        | 0.26         | 0.82        | 0.14          | 0.89        | 0.46         | <b>0.70</b> | <b>0.01</b>  |
| Muscle Associated Receptor Tyrosine Kinase                                | MUSK   | <b>8.33</b>     | <b>5E-58</b>      | 0.72        | 0.05 | <b>0.68</b> | <b>0.01</b>  | <b>0.36</b> | <b>1E-15</b>  | <b>0.51</b> | <b>4E-07</b> | 1.04        | 0.86         |
| Plectin                                                                   | PLEC   | <b>0.74</b>     | <b>5E-06</b>      | 0.99        | 0.95 | 1.15        | 0.10         | <b>1.37</b> | <b>3E-06</b>  | <b>1.30</b> | <b>2E-04</b> | 0.96        | 0.70         |
| Receptor Associated Protein Of The Synapse                                | RAPSN  | <b>2.69</b>     | <b>1E-44</b>      | 1.06        | 0.59 | 0.85        | 0.09         | <b>0.52</b> | <b>2E-19</b>  | <b>0.67</b> | <b>8E-08</b> | 1.10        | 0.32         |
| Sodium Voltage-Gated Channel Alpha Subunit 4                              | SCN4A  | <b>47.01</b>    | <b>&lt;1E-308</b> | 1.04        | 0.69 | 1.02        | 0.87         | <b>0.76</b> | <b>2E-06</b>  | <b>0.78</b> | <b>4E-05</b> | <b>1.24</b> | <b>8E-05</b> |
| ALG2 Alpha-1,3/1,6-Mannosyltransferase                                    | ALG2   | <b>0.63</b>     | <b>1E-24</b>      | 0.98        | 0.82 | 1.07        | 0.35         | <b>1.23</b> | <b>4E-05</b>  | 1.09        | 0.15         | <b>0.78</b> | <b>4E-06</b> |
| ALG14 UDP-N-Acetylglucosaminyltransferase Subunit                         | ALG14  | <b>0.64</b>     | <b>1E-05</b>      | 0.93        | 0.66 | 0.77        | 0.06         | <b>0.78</b> | <b>0.05</b>   | <b>0.72</b> | <b>8E-03</b> | 0.88        | 0.39         |
| Dolichyl-Phosphate N-Acetylglucosaminophosphotransferase 1                | DPAGT1 | <b>0.69</b>     | <b>4E-10</b>      | 1.07        | 0.46 | 1.03        | 0.78         | 1.02        | 0.88          | 0.97        | 0.77         | 0.94        | 0.51         |

|                                                      |         |              |                   |             |              |             |              |             |              |             |              |             |              |
|------------------------------------------------------|---------|--------------|-------------------|-------------|--------------|-------------|--------------|-------------|--------------|-------------|--------------|-------------|--------------|
| Glutamine--Fructose-6-Phosphate Transaminase 1       | GFPT1   | <b>0.75</b>  | <b>4E-06</b>      | 0.90        | 0.22         | 1.02        | 0.90         | 1.12        | 0.12         | 1.10        | 0.22         | <b>0.85</b> | <b>0.03</b>  |
| GDP-Mannose Pyrophosphorylase B                      | GMPPB   | <b>0.55</b>  | <b>2E-17</b>      | 1.05        | 0.64         | 1.06        | 0.62         | 0.93        | 0.44         | 0.99        | 0.94         | 0.95        | 0.65         |
| Solute Carrier Family 25 Member 1                    | SLC25A1 | <b>0.44</b>  | <b>5E-17</b>      | <b>1.34</b> | <b>0.03</b>  | <b>1.47</b> | <b>7E-04</b> | <b>2.09</b> | <b>2E-13</b> | <b>1.68</b> | <b>8E-07</b> | 1.14        | 0.35         |
| <b>Dystrophin-associated Complex (Gao 2015 [50])</b> |         |              |                   |             |              |             |              |             |              |             |              |             |              |
| Dystroglycan 1                                       | DAG1    | <b>1.57</b>  | <b>5E-22</b>      | 1.03        | 0.64         | <b>1.23</b> | <b>1E-04</b> | <b>1.50</b> | <b>7E-18</b> | <b>1.45</b> | <b>1E-14</b> | <b>0.86</b> | <b>8E-03</b> |
| Dystrophin                                           | DMD     | <b>11.60</b> | <b>5E-96</b>      | 0.81        | 0.21         | 0.98        | 0.94         | 0.95        | 0.81         | 1.02        | 0.94         | <b>0.71</b> | <b>0.01</b>  |
| Dystrobrevin Alpha                                   | DTNA    | <b>6.06</b>  | <b>2E-185</b>     | 1.01        | 0.90         | <b>0.84</b> | <b>7E-03</b> | <b>0.53</b> | <b>5E-30</b> | <b>0.78</b> | <b>3E-05</b> | 1.09        | 0.22         |
| Dystrobrevin Beta                                    | DTNB    | 0.99         | 0.97              | 0.90        | 0.57         | 1.13        | 0.51         | <b>1.66</b> | <b>2E-05</b> | 1.19        | 0.28         | 1.29        | 0.08         |
| Laminin Subunit Alpha 2                              | LAMA2   | <b>2.06</b>  | <b>4E-14</b>      | 0.87        | 0.33         | 1.02        | 0.93         | 1.26        | 0.03         | 1.24        | 0.06         | 0.84        | 0.15         |
| Sarcoglycan Alpha                                    | SGCA    | <b>4.32</b>  | <b>4E-89</b>      | 1.19        | 0.08         | 1.02        | 0.88         | <b>0.75</b> | <b>3E-04</b> | <b>0.81</b> | <b>0.02</b>  | <b>1.28</b> | <b>3E-03</b> |
| Sarcoglycan Beta                                     | SGCB    | 0.93         | 0.26              | 0.96        | 0.68         | 1.13        | 0.10         | <b>1.42</b> | <b>3E-09</b> | <b>1.31</b> | <b>1E-05</b> | 0.96        | 0.62         |
| Sarcoglycan Gamma                                    | SGCG    | <b>43.16</b> | <b>2E-123</b>     | 0.98        | 0.86         | <b>0.71</b> | <b>4E-05</b> | <b>0.26</b> | <b>6E-60</b> | <b>0.48</b> | <b>2E-20</b> | <b>1.53</b> | <b>5E-08</b> |
| Sarcoglycan Delta                                    | SGCD    | <b>8.73</b>  | <b>2E-169</b>     | <b>0.67</b> | <b>1E-05</b> | <b>0.49</b> | <b>1E-19</b> | <b>0.23</b> | <b>2E-82</b> | <b>0.38</b> | <b>7E-36</b> | <b>0.63</b> | <b>2E-08</b> |
| Syntrophin Alpha 1                                   | SNTA1   | <b>0.64</b>  | <b>3E-10</b>      | 1.18        | 0.09         | 1.11        | 0.33         | 1.16        | 0.07         | 1.14        | 0.15         | 1.06        | 0.63         |
| Syntrophin Beta 1                                    | SNTB1   | <b>4.06</b>  | <b>8E-86</b>      | 0.85        | 0.09         | <b>0.79</b> | <b>4E-03</b> | <b>0.58</b> | <b>2E-13</b> | <b>0.71</b> | <b>7E-06</b> | 1.10        | 0.36         |
| Syntrophin Beta 2                                    | SNTB2   | <b>0.30</b>  | <b>3E-97</b>      | 1.03        | 0.77         | <b>1.26</b> | <b>1E-03</b> | <b>2.12</b> | <b>9E-37</b> | <b>1.83</b> | <b>4E-23</b> | 1.08        | 0.39         |
| Sarcospan                                            | SSPN    | <b>11.01</b> | <b>&lt;1E-308</b> | 0.92        | 0.31         | <b>0.78</b> | <b>4E-05</b> | <b>0.52</b> | <b>1E-31</b> | <b>0.71</b> | <b>2E-09</b> | 0.91        | 0.23         |
| Utrophin                                             | UTRN    | 0.77         | 0.18              | 0.71        | 0.16         | 0.79        | 0.35         | 1.01        | 0.97         | 1.03        | 0.94         | 0.80        | 0.37         |

Neuromuscular Junction Function markers reported in Rodríguez Cruz et al. [49] and dystrophin-associated complex marker from Gao et al. [50]. NOS1, SNTG1, and SNTG2 excluded from analysis due to low transcript abundance. nr = not reported in DESeq2 differential expression analysis. FC = fold change, padj = Benjamini-Hochberg adjusted p-value. Significantly differentially expressed markers highlighted in bold (padj <0.05).

**Table S5:** Composition and Derivation of Composite FSHD Transcriptomic Biomarkers

| Source of Gene List | Target | Target-associated Genes              | Composite Readout                                      | Method     | Derivation Model                                                           | Reference |
|---------------------|--------|--------------------------------------|--------------------------------------------------------|------------|----------------------------------------------------------------------------|-----------|
| Geng (2012)         | DUX4   | 165 upregulated                      | Mean of z-score normalized gene expression data        | Microarray | DUX4 transduced myocytes                                                   | [8]       |
| Yao (2014)          | DUX4   | 213 upregulated                      | Mean of z-score normalized gene expression data        | RNA-seq    | DUX4 transduced myocytes, primary muscle cells, and muscle tissue biopsies | [43]      |
| Choi (2016)         | DUX4   | 212 upregulated                      | Mean of z-score normalized gene expression data        | RNA-seq    | DUX4 transduced myocytes                                                   | [14]      |
| Banerji (2017)      | PAX7   | 311 upregulated<br>290 downregulated | t-statistic of z-score normalized gene expression data | Microarray | PAX7 transduced myocytes                                                   | [19]      |
